# Supplementary material
Source: PubMed Central journal article supplement (PMC2781544)
Supplement: supp_M109.033936_jbc.M109.033936-1.pdf [file supp_M109.033936_jbc.M109.033936-1.pdf]

Sup. Fig. 1, Liu et al.

A.

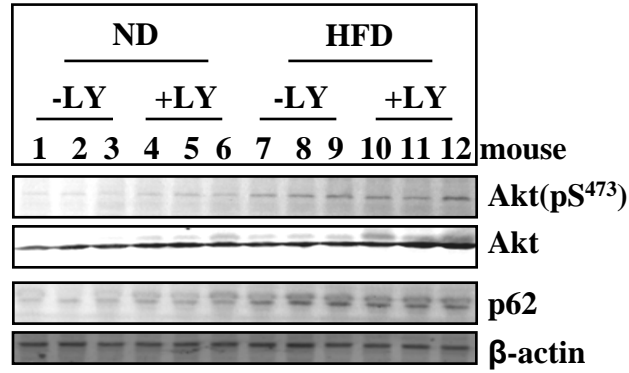

B.

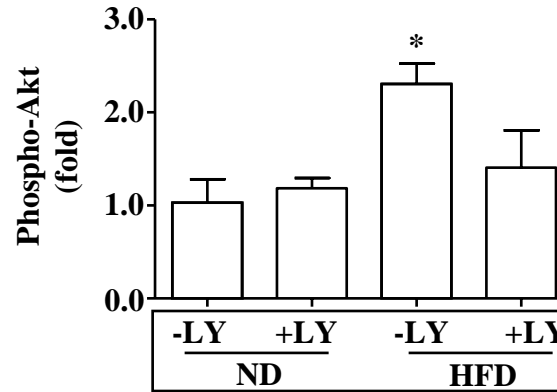

C.

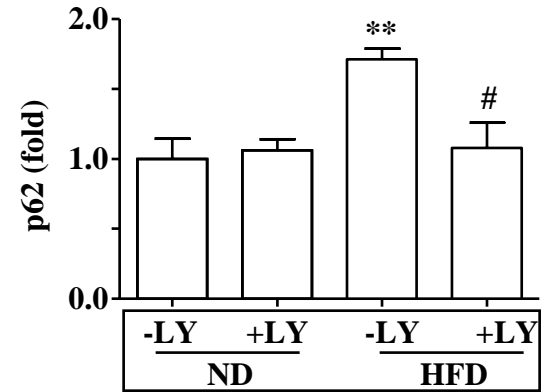

D.

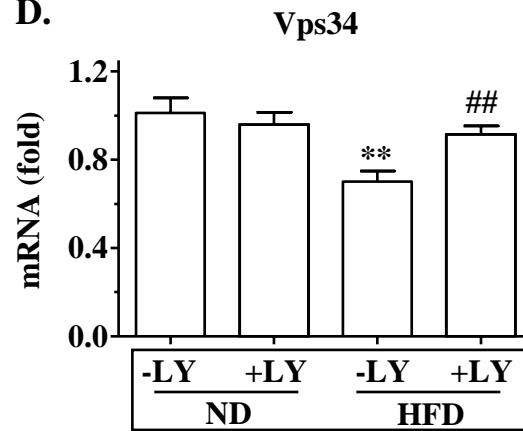

E.

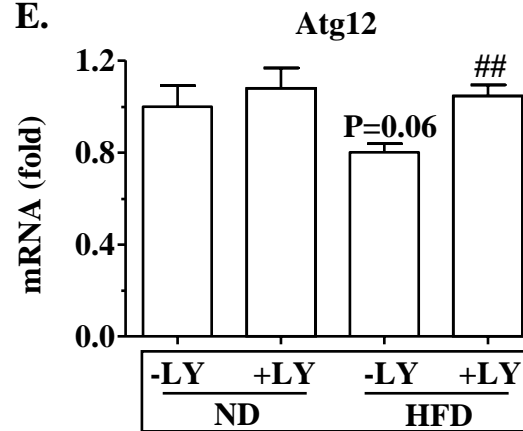

F.

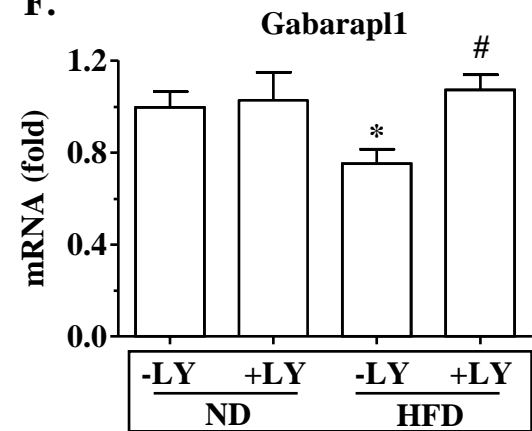

**Sup. Fig. 1. Insulin may be responsible for the suppressed autophagy induced by the HFD in mice.** B6 mice were fed with either ND (n = 12) or HFD (n = 12) for 4 weeks. During the last week, six mice of each group were administrated LY(I.P., once a day, 10 mg/kg body weight, × 7 days) during the day time. Levels of Akt (total and phospho-), p62 and  $\beta$ -actin were measure with immunoblotting and quantified (n = 6 each group)(A-C). Transcripts of Vps34, Atg12, and Gabarap11 genes were determined by using Real-Time PCR and normalized to the level of 36B4 transcript (C-F). Results presented in bar graphs represent mean  $\pm$  SEM. \*p < 0.05 and \*\*p < 0.01 HFD only vs. ND only. #p < 0.05 and ##p < 0.01 HFD + LY group vs. HFD only group. ND, normal chow diet; HFD, high fat diet; LY: LY294002.
